# Supplementary material
Source: publisher figshare collection journal article supplement (https://tandf.figshare.com/ndownloader/files/18009056)
Supplement: Supplementary file 1 [file 18009056]

**Appendix - Supplementary Material**

Volatile sulfide compounds (VSCs) and ammonia emission characteristics and odor contribution in the process of municipal sludge composting

Zhao Shan1,2,3, Yang Xiaofang1,*, Zhang Weijun 4, Jiang Chang3, Wang Dongsheng1,2,*

1. Research Center for Eco-Environmental Sciences, Chinese Academy of Sciences, Beijing 100085, China;

2. University of Chinese Academy of Sciences, Beijing 100049, China;

3. Research and Development Center, Beijing Drainage Group Co., Ltd, Beijing 100124, China;

4. School of Environmental Studies, China University of Geosciences, Wuhan 430074, Hubei, China

The appendix contains 3 Figures and 1 Table.

***Figures:***

Figure A1. Flow chart of the sludge aerobic composting process.

Figure A2. Sampling points of NH3 and VSCs in the sludge treatment workshops.

Figure A3. The sketch of the static chamber of sludge composting

***Figures:***

Table R1. Method detection limits and R2 of calibration curves of VSCs


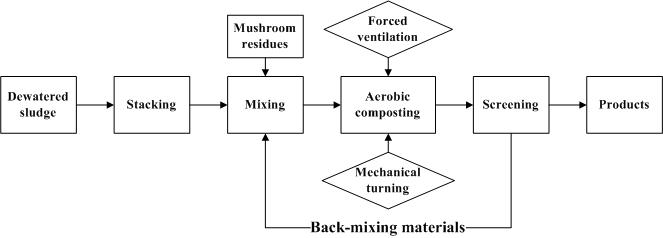


Figure A1. Flow chart of the sludge aerobic composting process.


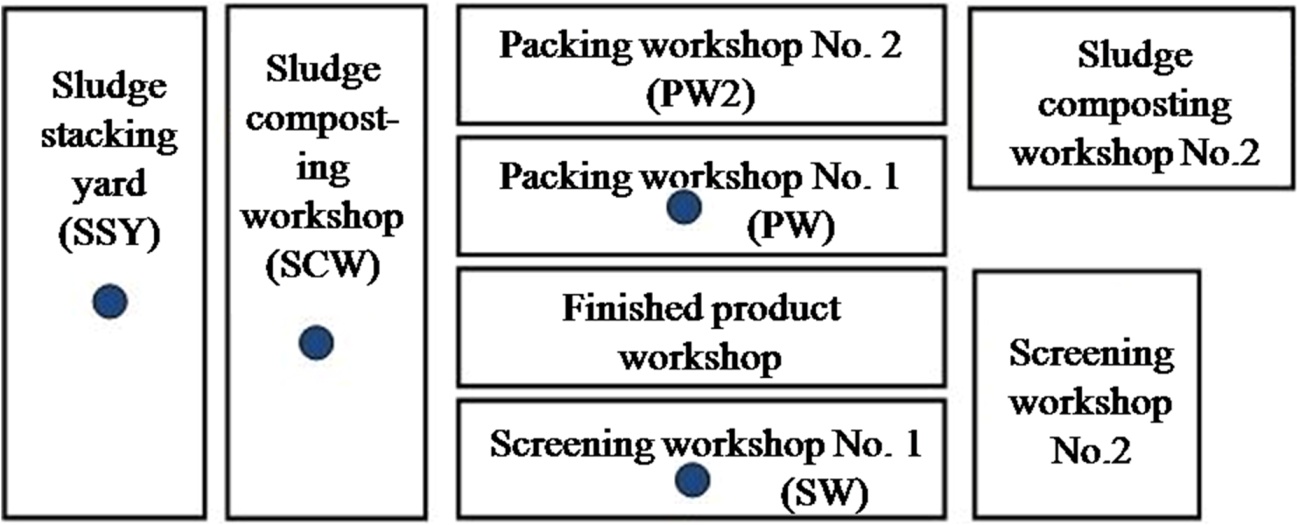


Figure A2. Sampling points of NH3 and VSCs in the sludge treatment workshops.


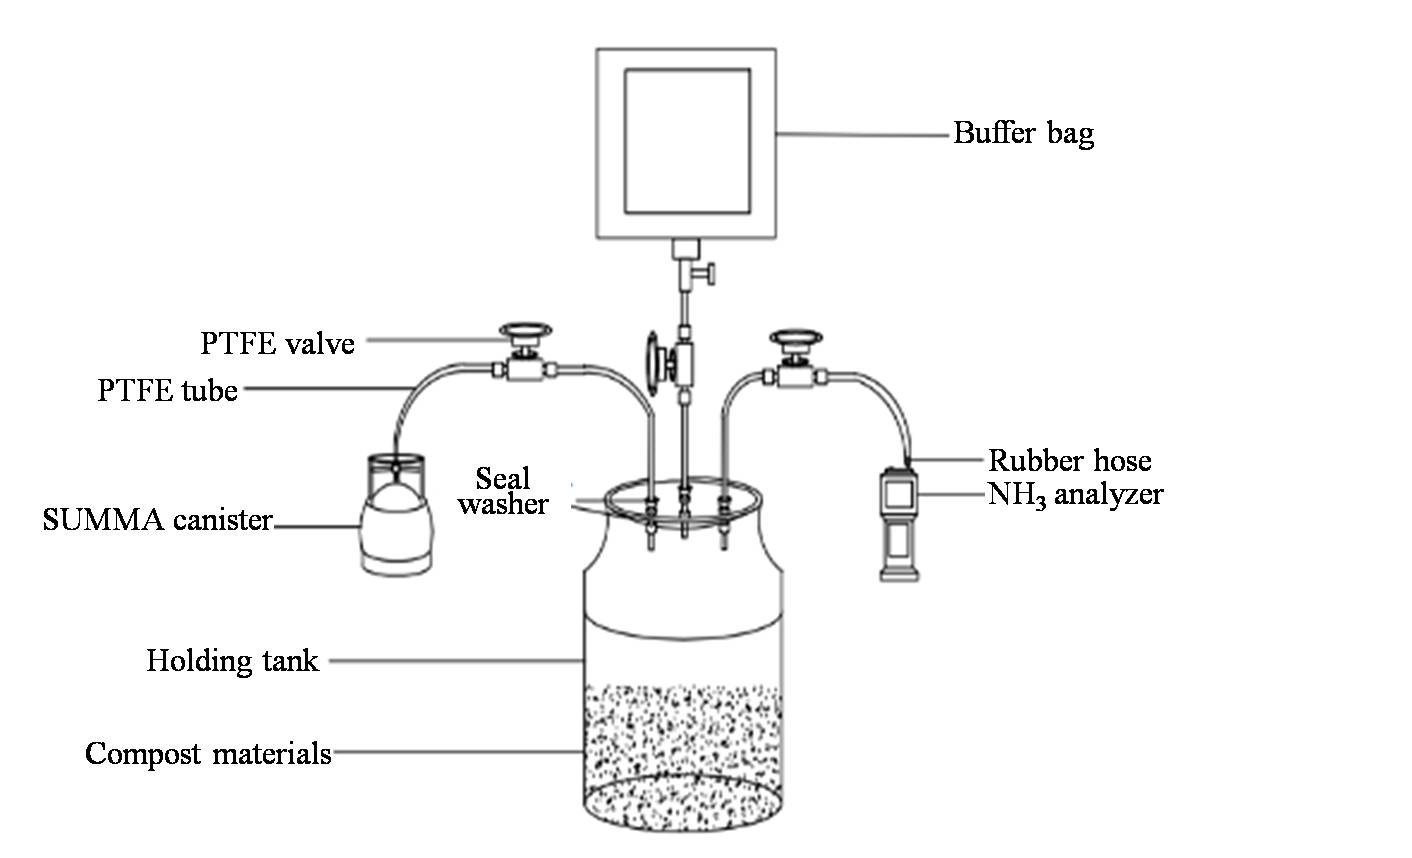


Figure A3. The sketch of the static chamber of sludge composting.

***Table:***

Table A1. Method detection limits and R2 of calibration curves of VSCs

| VSCs | Detection limits (μg·m-3) | Calibration curves R2 |
| --- | --- | --- |
| H2S | 0.189 | R2=0.9999, p<0.01 |
| MT | 0.144 | R2=0.9999, p<0.01 |
| DMS | 0.048 | R2=0.9998, p<0.01 |
| CS2 | 0.028 | R2=0.9433, p<0.01 |
| DMDS | 0.037 | R2=0.9998, p<0.01 |
